# Supplementary material for: Mechanosynthesis of ultra-small monodisperse amine-stabilized gold nanoparticles with controllable size
Source: Royal Society of Chemistry journal article supplement (doi:10.1039/c3gc41827h), 2013-10-29
Supplement: c3gc41827h.pdf [file c3gc41827h.pdf]

## Supporting information to

# Mechanochemical Synthesis of Ultrasmall Monodisperse Amine-Stabilized Gold Nanoparticles with Controllable Size

Monika J. Rak, Nadim K. Saadé, Tomislav Friščić and Audrey Moores\*

### Table of Contents

1. Experimental Details
2. TEM Measurements
3. UV-Vis Spectroscopy Data
4. XPS Data
5. XRD Data
6. Maldi-TOF MS

## 1. Experimental Details

### **Materials and Reagents:**

All chemicals and solvents were purchased from commercial sources and used without purification. Hydrogen tetrachloroaurate (III) hydrate was purchased from Strem Chemicals, Inc. Octadecylamine, hexadecylamine, pentadecylamine, DMAP, 4,4'-BIPY, imidazole, benzyl disulfide, citrate, and  $\omega$ -mercaptododecanoic acid were purchased from Sigma-Aldrich. 400-mesh carbon supported TEM grids were obtained from Electron Microscopy Science. DCTB (*trans*-2-[3-(4-*tert*-butylphenyl)-2-methyl-2-propenyldiene]malononitrile) was used as a Maldi-TOF matrix and was purchased from Sigma-Aldrich.

### **Equipment:**

High-resolution TEM and EDAX were performed using a Philips CM200 200 kV TEM. UV-vis spectra were recorded on a Jasco V-660 spectrophotometer. XPS was performed on a VG ESCALAB 3 MKII spectrometer (VG, Thermo Electron Corporation, UK) equipped with an Mg K $\alpha$  source. PXRD was performed using the Bruker D2 Phaser diffractometer using as CuK $\alpha$  source. A Retsch Mixer Mill MM 400 was used to perform milling experiments. Maldi-TOF MS measurements were performed using the Bruker Autoflex III with a laser source of Nd-YAG UV 355nm and a flight tube of 1.6m in linear mode.

### **Synthesis of Au NP:**

In a typical reaction a 10mL stainless steel milling jar was filled with a total of 0.2000g of solid reagent material where a 1:5 ratio of precursor to ligand would require 0.0403g of HAuCl<sub>4</sub> and 0.1597g octadecylamine. To this, two 7mm stainless steel balls were added. For the scale-up experiment, a 25 mL jar was used with 1g of starting material. The jar was then closed and loaded onto the Retsch Mixer Mill. The reaction took place over 90min. at 29.5Hz. At the end of the reaction, the solid product was scrapped out of the jar with a spatula and weighed. The product was suspended in 2mL of toluene and sonicated for 2min. The suspension was then placed next to a supermagnet to remove any free steel shrapnel from the milling process. The solution was decanted, leaving any steel behind with the magnet. TEM sample was taken. All TEM grids were made with mill nanoparticles suspended in toluene and deposited onto a 400-mesh carbon supported copper TEM grid. Furthermore, the solution was gently ground with a mortar and pestle, the solvent was pipetted off and passed through a fritted filter. Two more 2mL toluene aliquots were passed through the mortar and pestle with the remaining solid. A sampling of the filtrate is taken for TEM measurements and the toluene is then evaporated off.

### **Maldi-TOF MS measurements:**

Maldi-TOF MS samples were prepared as follows: 10mg of DCTB and 1mg of AuNPs were gently ground with a mortar and pestle for about 5min until the sample appeared homogeneous by eye. The solid was then placed onto the Maldi-TOF sample plate and a 5 $\mu$ L drop of MeOH (HPLC grade) was dropped onto the solid. The solution was allowed to evaporate off and Maldi-TOF measurements were taken in linear positive mode.

## 2. TEM Data

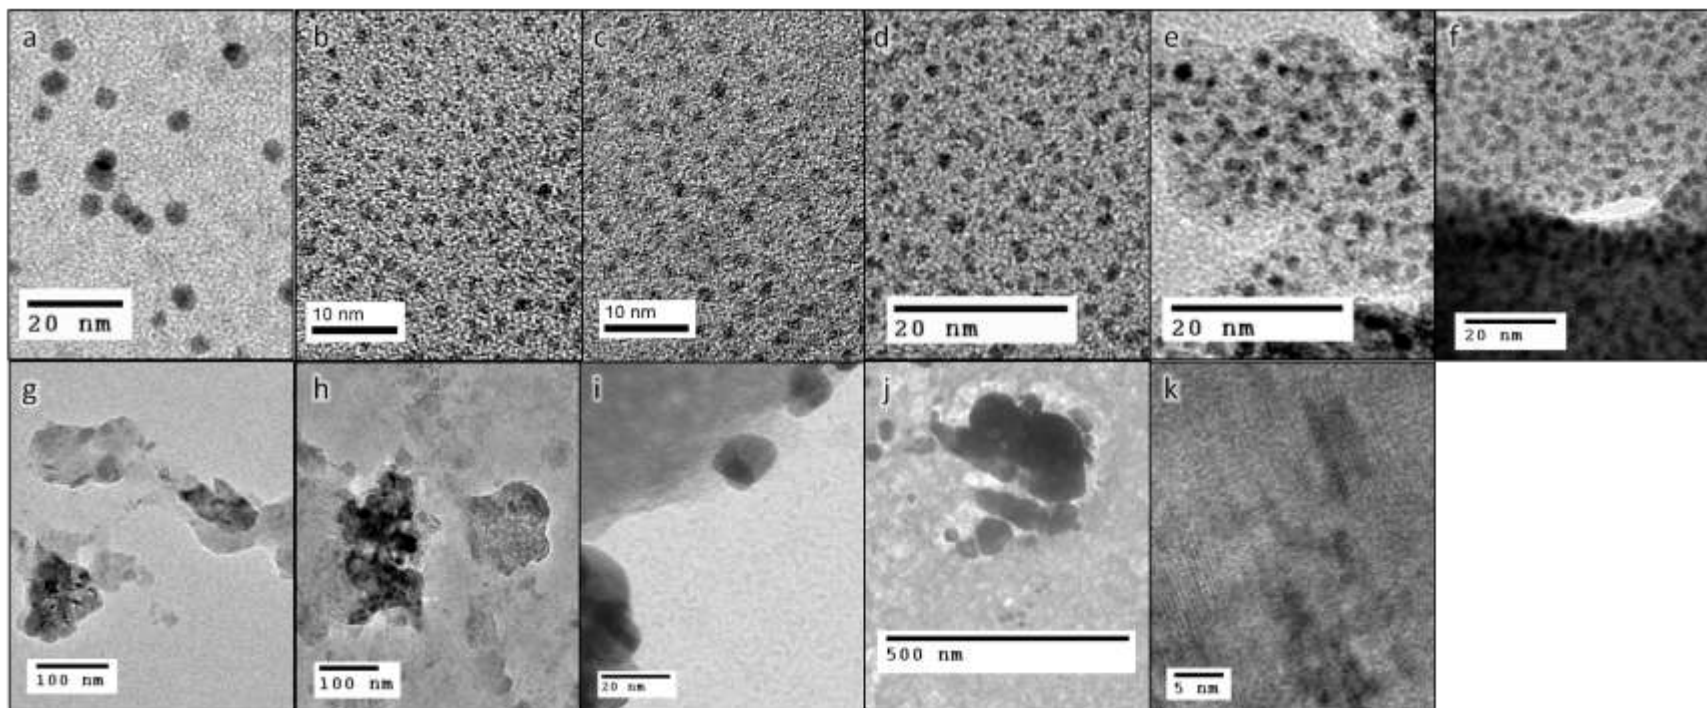

Figure S1: Representative TEM images obtained for the AuNP synthesis with the following ligands: a. pentadecylamine-AuNPs, b. hexadecylamine-AuNPs, c. heptadecylamine-AuNPs, d. octadecylamine-AuNPs, e. DMAP-AuNPs, f. 4,4'-BIPY-AuNPs, g. imidazole-AuNP, h. 1-methylimidazole-AuNPs, i. benzyl disulfide-AuNPs, j. citrate-AuNP, k.  $\omega$ -mercaptododecanoic acid-AuNP

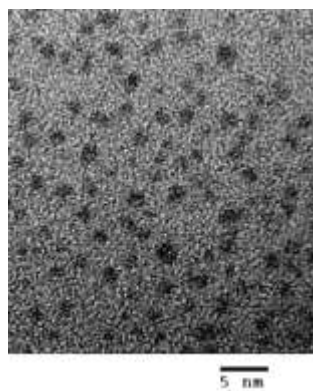

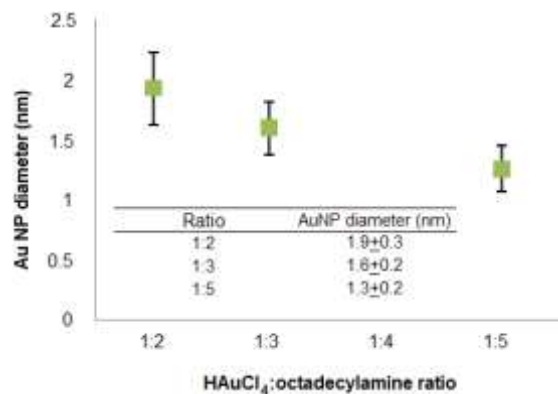

Figure S2: Effect of HAuCl<sub>4</sub>:ligand molar ratio on the resulting AuNP diameter.

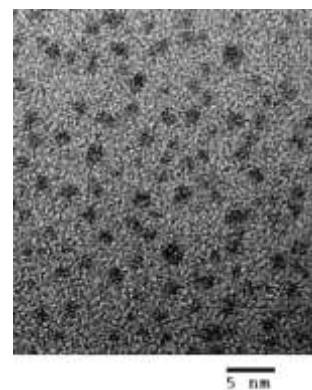

Figure S3: Representative TEM image of the gram-scale synthesis of AuNPs  
 Reaction condition: octadecylamine used as ligand, at 29.5Hz for 90min,  
 HAuCl<sub>4</sub>:ligand of 1:5 ratio

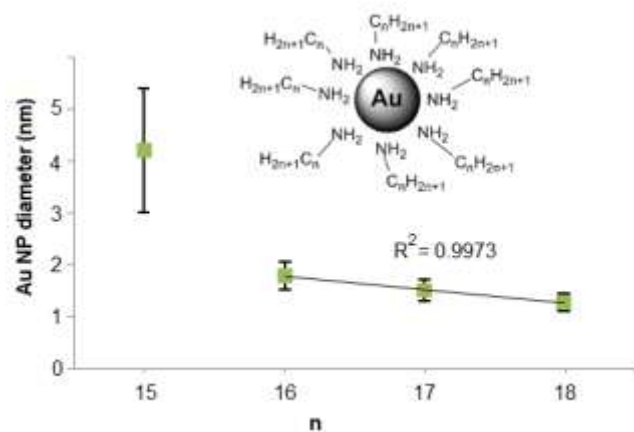

Figure S4: Dependence of the resulting Au NP diameter on the chain length of the amine ligand when long chain alkyl amines C<sub>n</sub>H<sub>2n+1</sub>NH<sub>2</sub> are used (n=15 to 18). A linear trend is observed between n=16-18. Reaction conditions: 5:1 ligand:HAuCl<sub>4</sub> ratio milled at 30 Hz for 90 minutes.

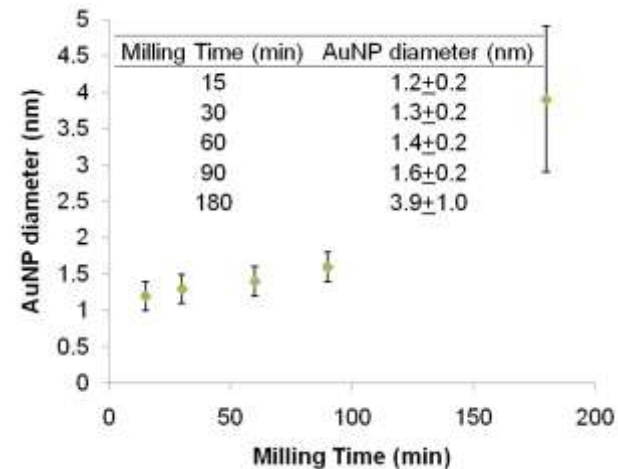

Figure S5: Effect of milling time on AuNP diameter. Reaction conditions: 5:1 moles octadecylamine:HAuCl<sub>4</sub> milled at 29.5Hz

### 3. UV-Vis Spectroscopy Data

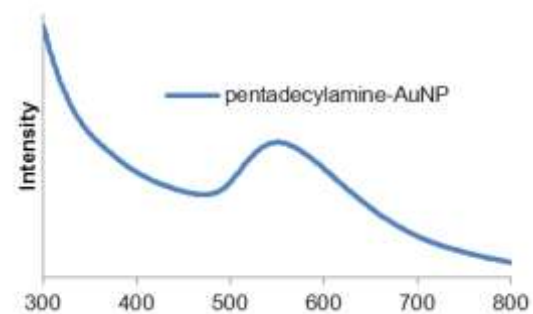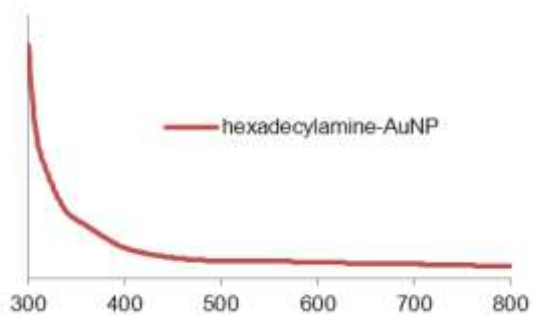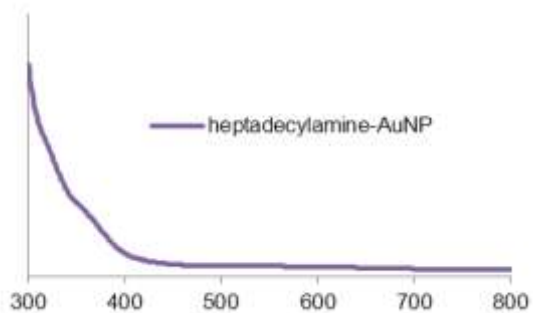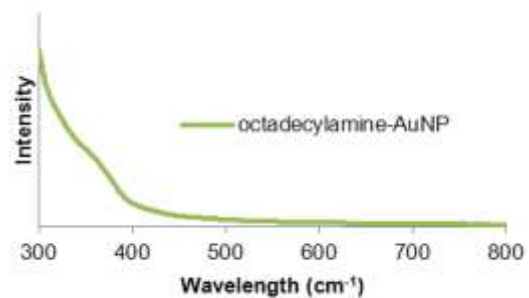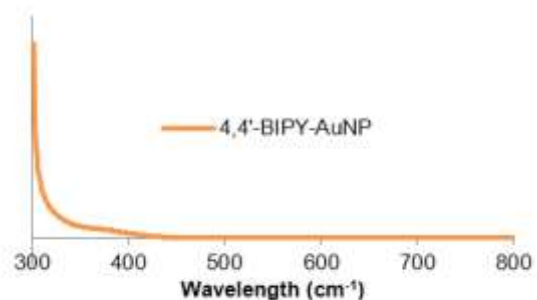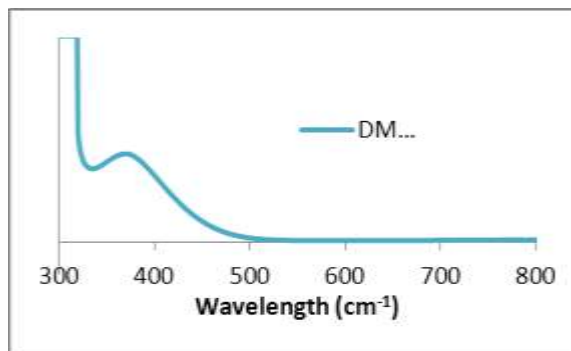

Figure S6: UV/Visible spectra of suspended AuNPs synthesized using different stabilizing ligands.

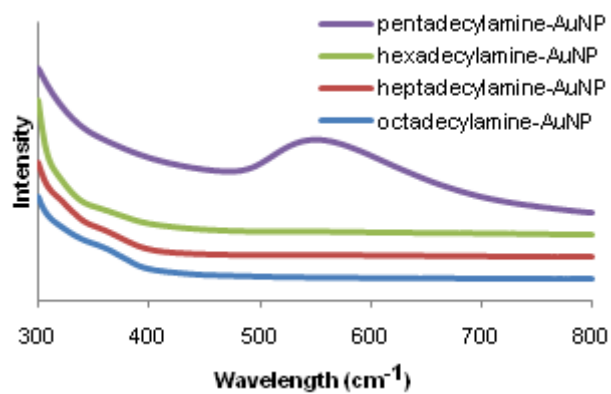

Figure S7: Direct comparison of UV/Visible spectra of suspended AuNPs synthesized using different alkyl amine stabilizing ligands.

4. XPS Data

(A survey of the regions of Ni and Cr indicated no presence of these metals in the sample)

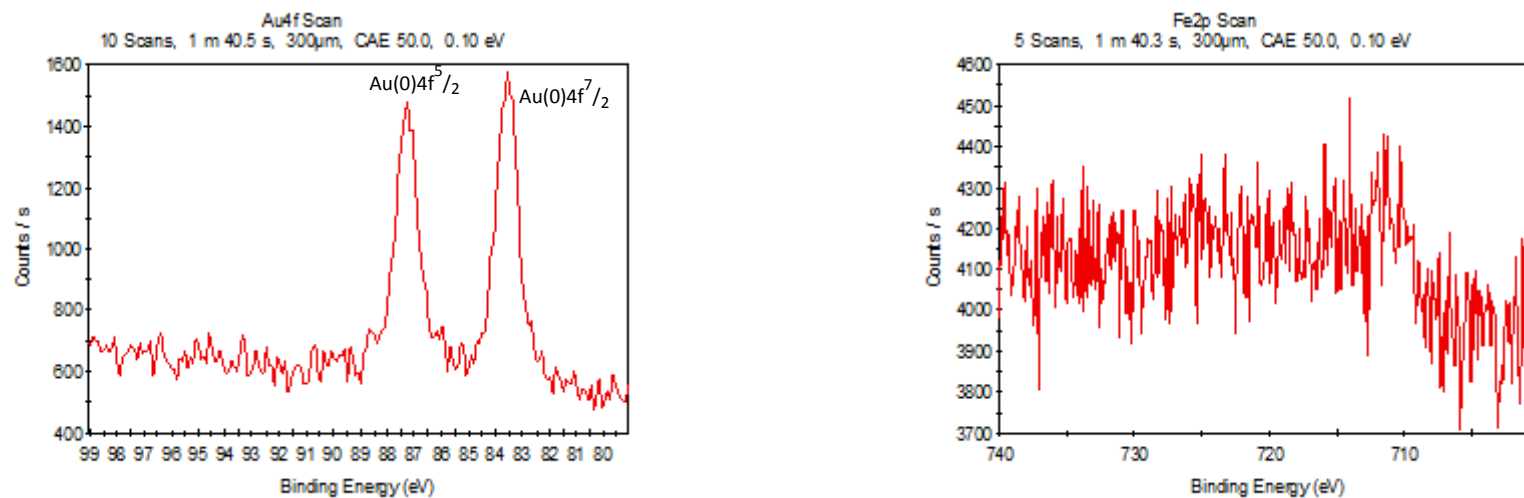

Figure S8: XPS spectra of the Au4f (left) and Fe2p (right) regions for pentadecylamine -AuNP:

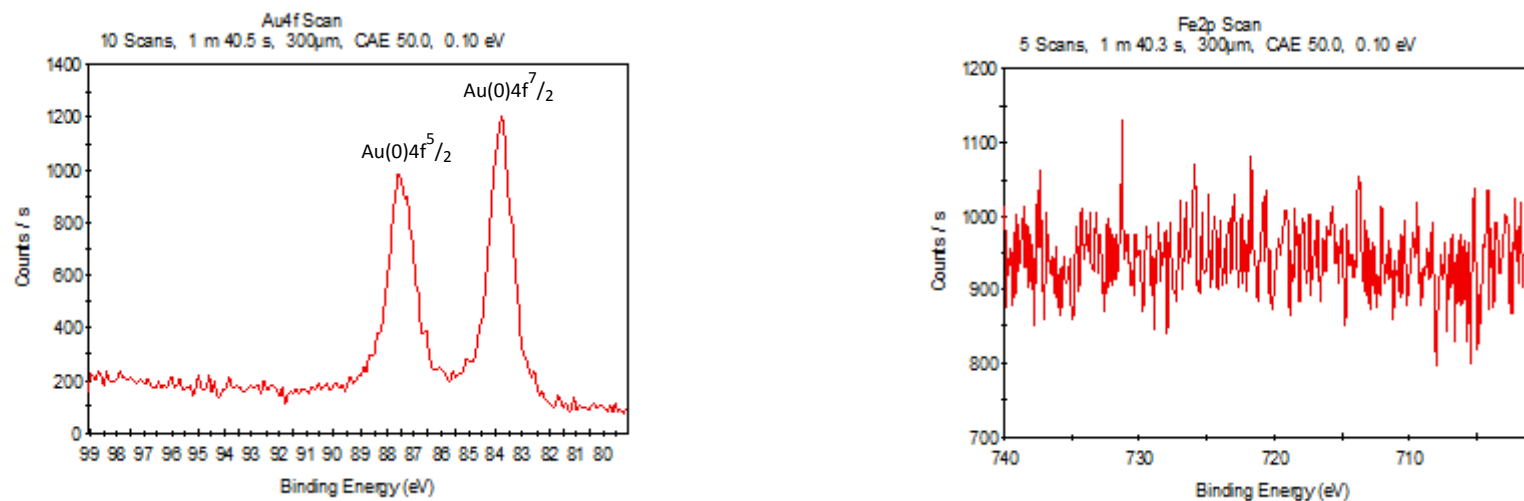

Figure S9: XPS spectra of the Au4f (left) and Fe2p (right) regions for hexadecylamine -AuNP:

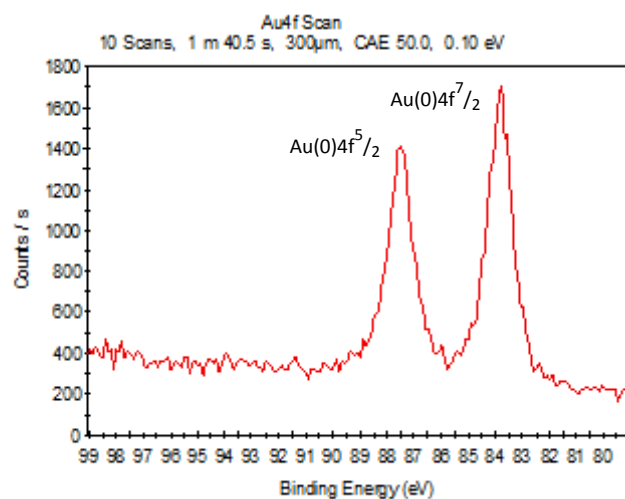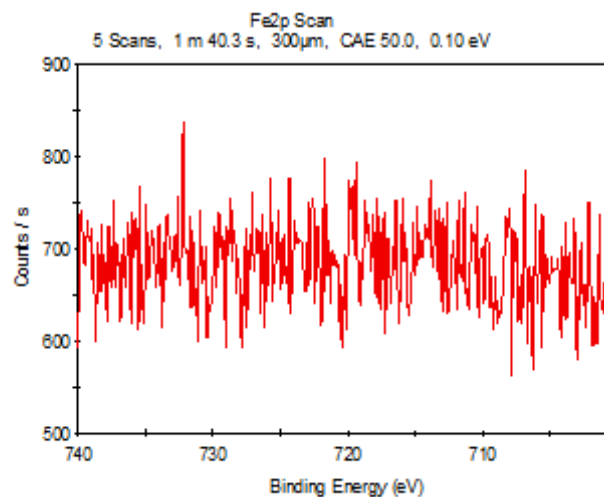

Figure S10: XPS spectra of the Au4f (left) and Fe2p (right) regions for heptadecylamine-AuNP

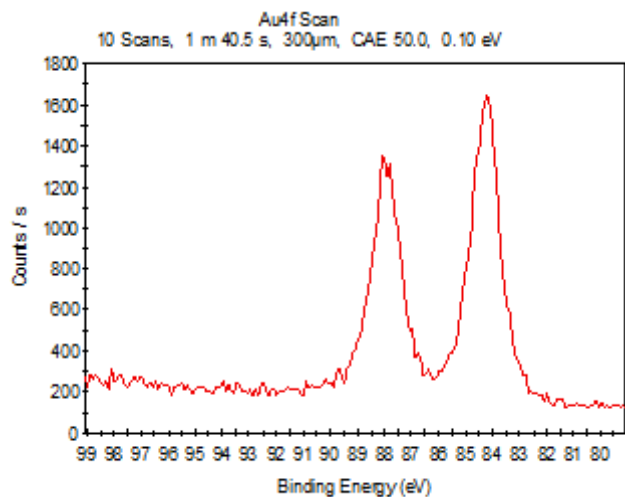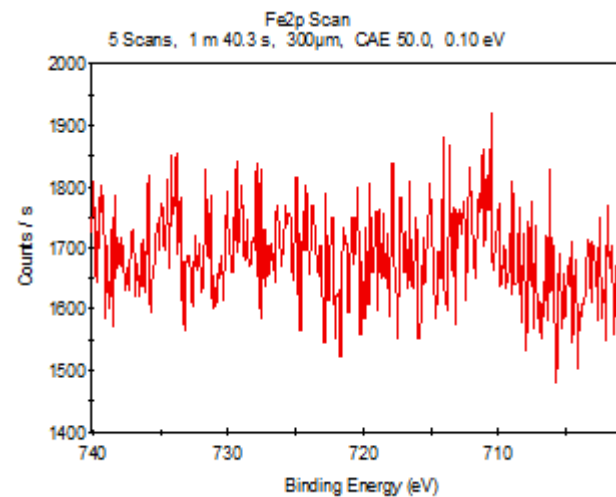

Figure S11: XPS spectra of the Au4f (left) and Fe2p (right) regions for octadecylamine -AuNP:



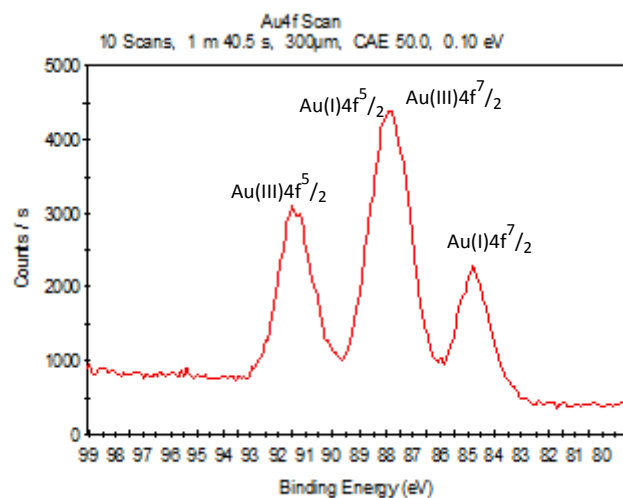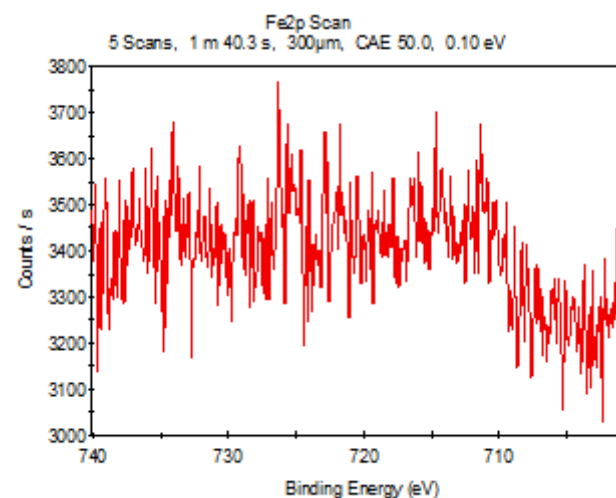

Figure S12: XPS spectra of the Au4f (left) and Fe2p (right) regions for DMAP –AuNP:

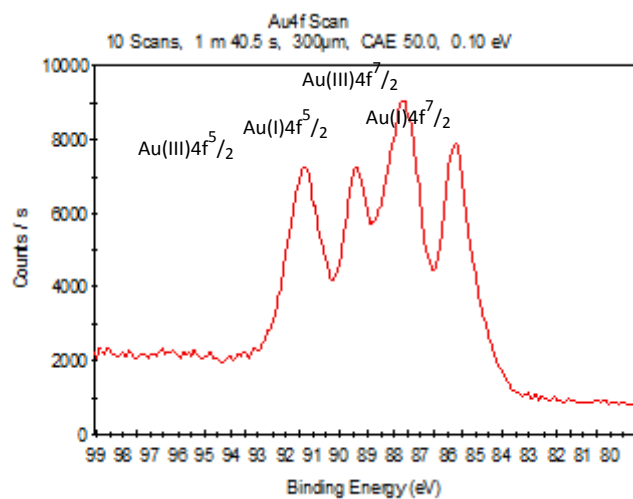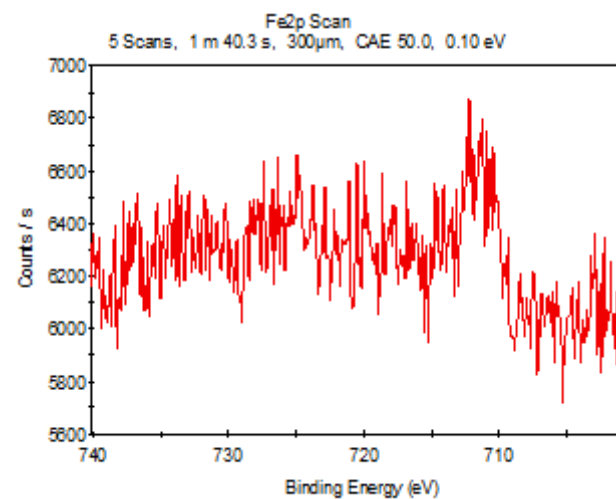

Figure S13: XPS spectra of the Au4f (left) and Fe2p (right) regions for 4,4'-BIPY-AuNP:

(using <http://srdata.nist.gov/xps/Default.aspx> to assign peaks)

5. Powder XRD Data

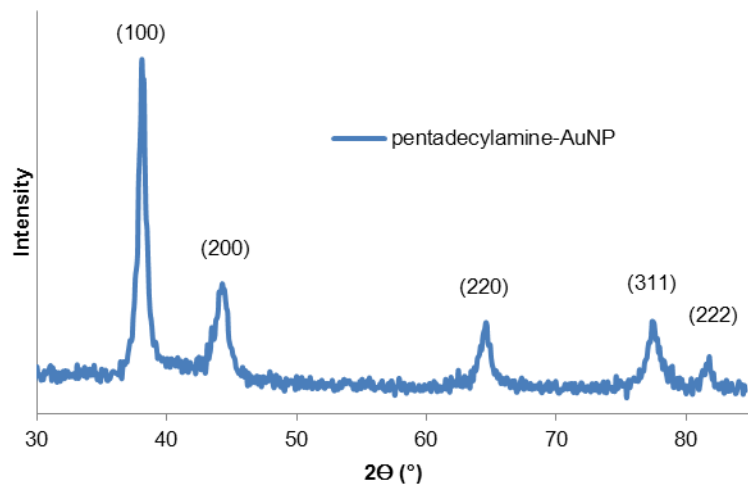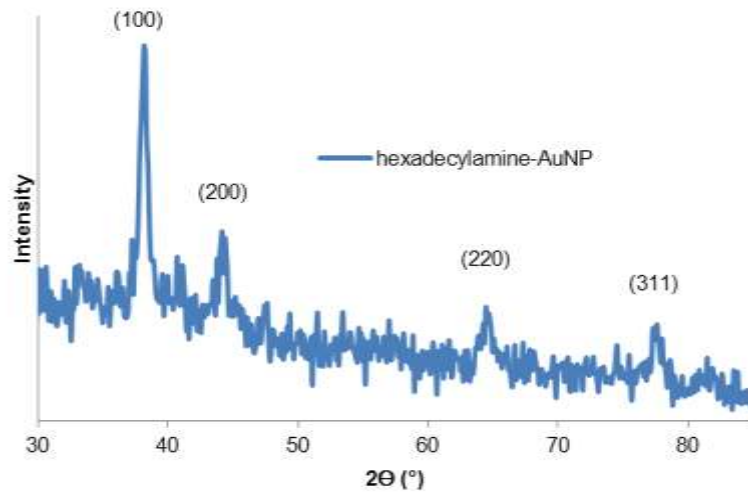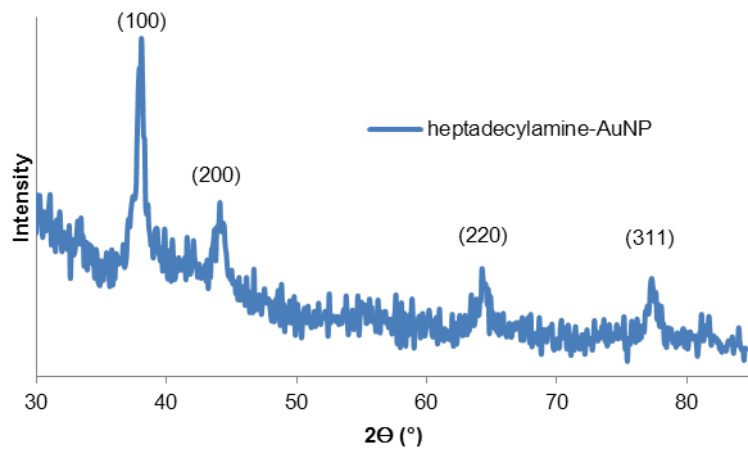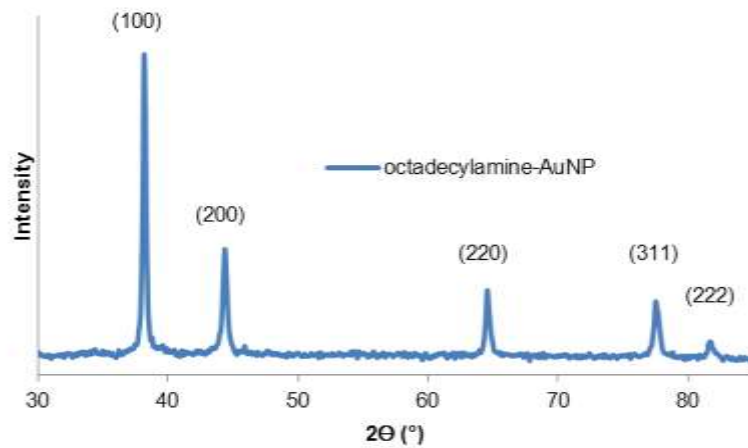

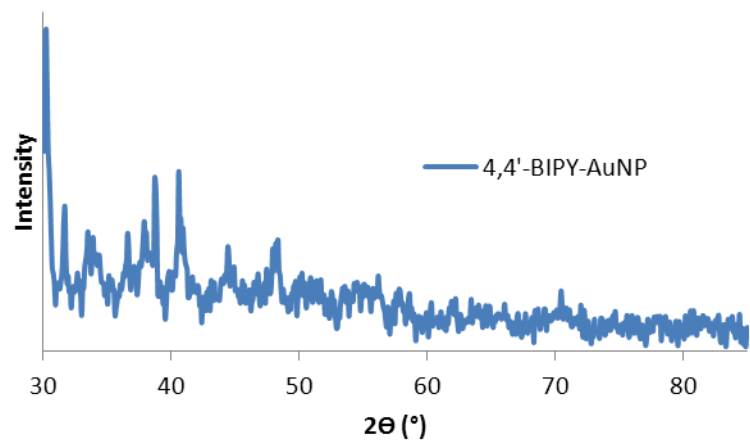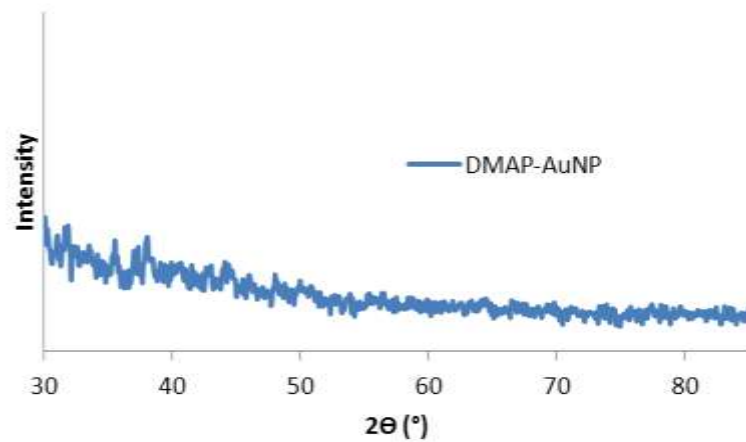

Figure S14: XRD patterns for AuNPs stabilized by a variety of ligands.

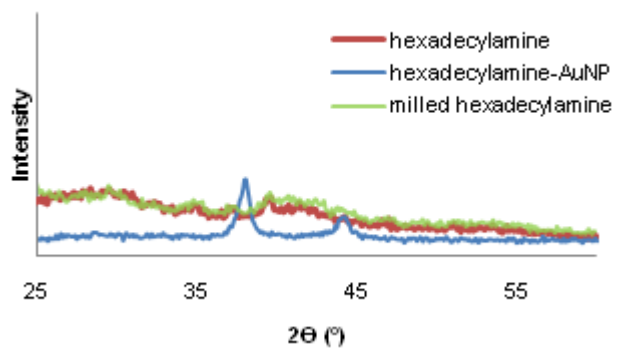

Figure S15: Comparison of powder XRD of hexadecylamine and hexadecylamine stabilized AuNPs. AuNPs synthesized by milling with 5 mol excess of ligand for 90 min at 29.5Hz.

6. Maldi-TOF MS

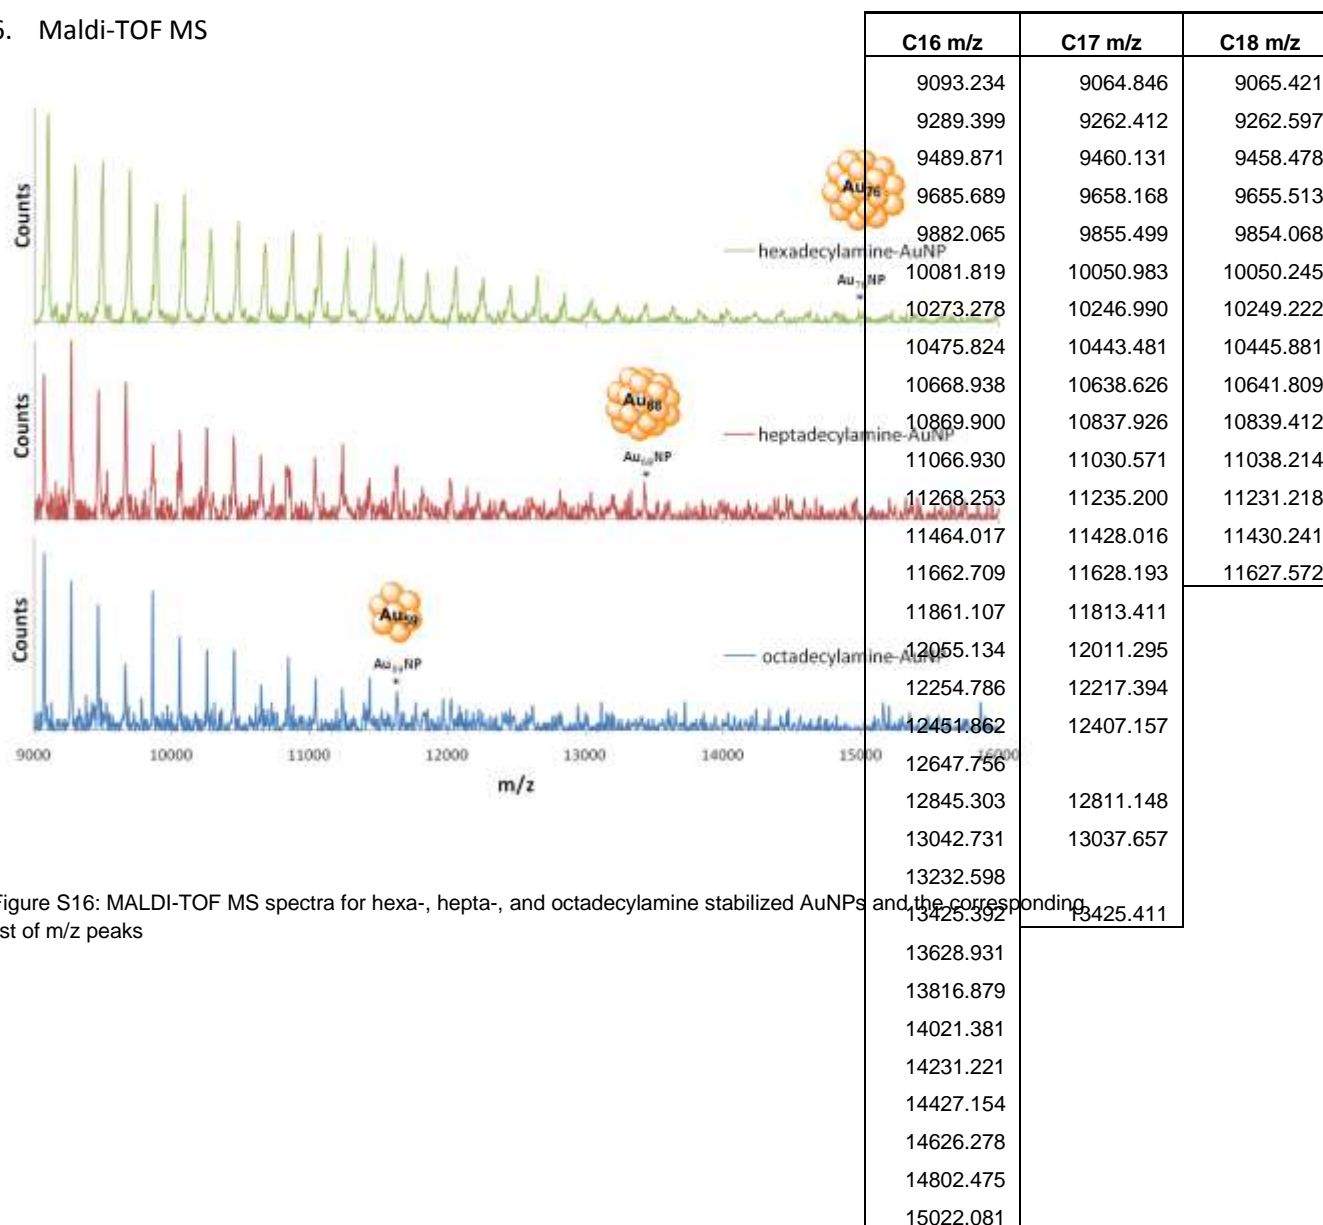

Figure S16: MALDI-TOF MS spectra for hexa-, hepta-, and octadecylamine stabilized AuNPs and the corresponding list of m/z peaks

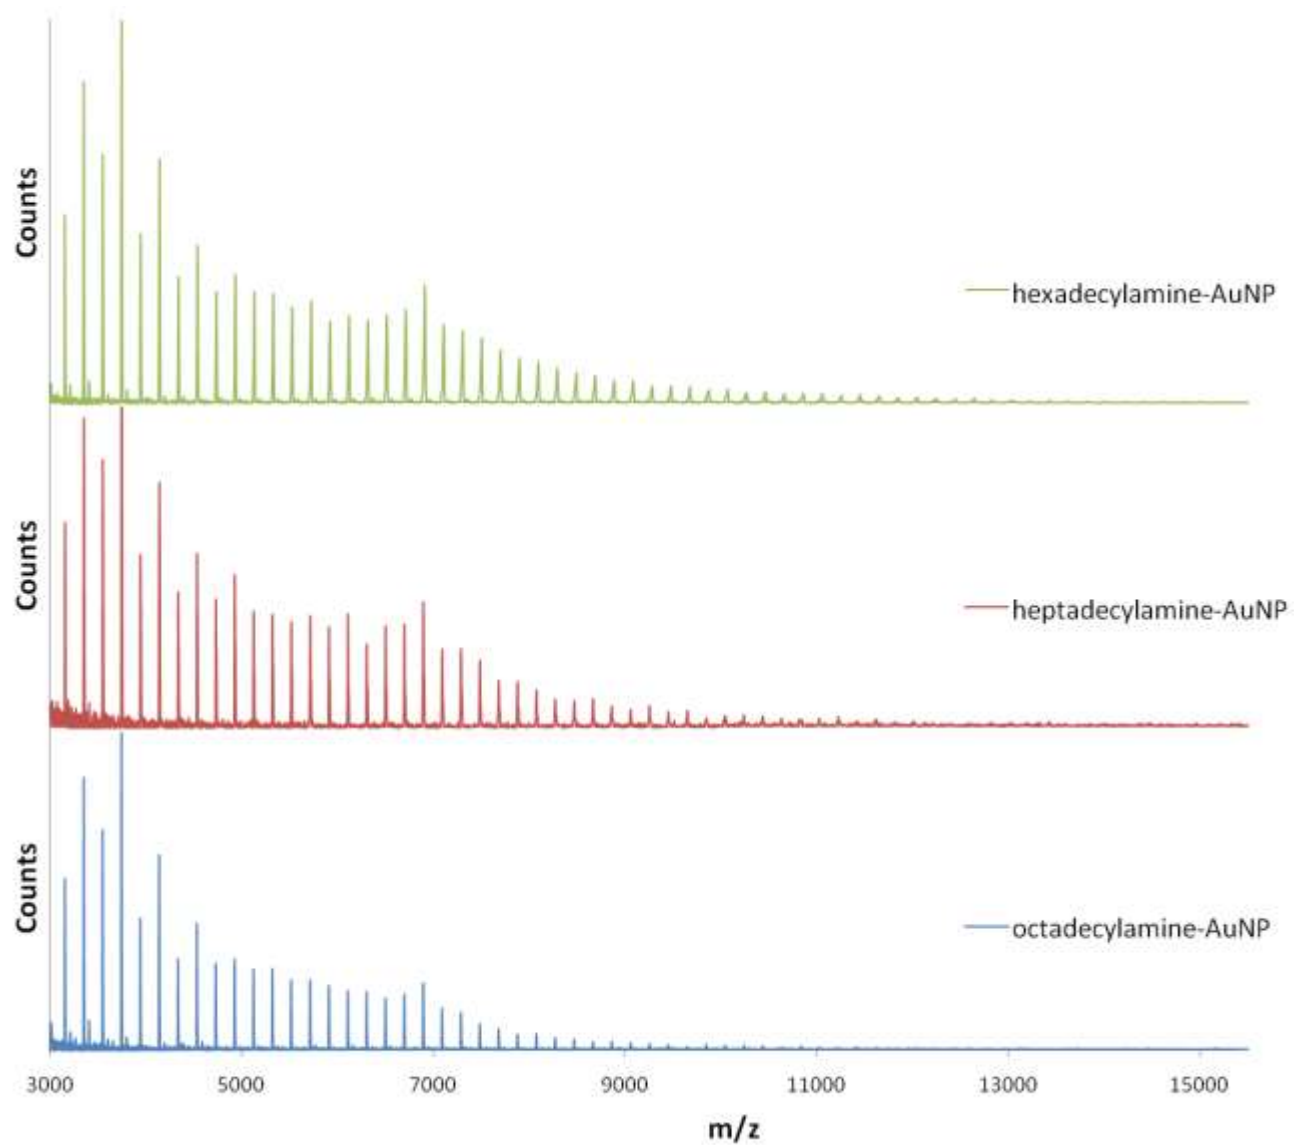

Figure S16: Expanded window of MALDI-TOF MS spectra for hexa-, hepta-, and octadecylamine stabilized AuNPs and the corresponding list of  $m/z$  peaks
